## Correction: Prorenin receptor acts as a potential molecular target for pancreatic ductal adenocarcinoma diagnosis

Arivajiagane Arundhathi<sup>1,4,\*</sup>, Wen-Han Chuang<sup>1,\*</sup>, Jen-Kun Chen<sup>2,\*</sup>, Shin-E Wang<sup>3,\*</sup>, Yi-Ming Shyr<sup>3</sup>, Jiun-Yu Chen<sup>2</sup>, Wei-Neng Liao<sup>2</sup>, Hsin-Wei Chen<sup>1</sup>, Yi-Min Teng<sup>1</sup>, Chiao-Chih Pai<sup>1</sup> and Chih-Hong Wang<sup>1</sup>

<sup>1</sup> Department of Biological Science and Technology, National Chiao Tung University, Hsinchu, Taiwan

<sup>2</sup> Institute of Biomedical Engineering & Nanomedicine, National Health Research Institutes, Miaoli, Taiwan

<sup>3</sup> Department of General Surgery, Taipei Veterans General Hospital, and National Yang Ming University, Taipei, Taiwan

<sup>4</sup> Institute of Molecular Medicine and Bioengineering, National Chiao Tung University, Hsinchu, Taiwan

\* These authors have contributed equally to this work

**Published:** January 11, 2019

Copyright: Arundhathi et al. This is an open-access article distributed under the terms of the Creative Commons Attribution License 3.0 (CC BY 3.0), which permits unrestricted use, distribution, and reproduction in any medium, provided the original author and source are credited.

**This article has been corrected:** Due to an error in proofreading, the total ERK, AKT, and S6K in Figure 4A are incorrect. The proper Figure 4A is shown below. In addition, updates have been made to the 3rd affiliation and a 4th affiliation has been added. Both are shown below. The authors declare that these corrections do not change the results or conclusions of this paper.

<sup>3</sup> Department of General Surgery, Taipei Veterans General Hospital, and National Yang Ming University, Taipei, Taiwan

<sup>4</sup> Institute of Molecular Medicine and Bioengineering, National Chiao Tung University, Hsinchu, Taiwan

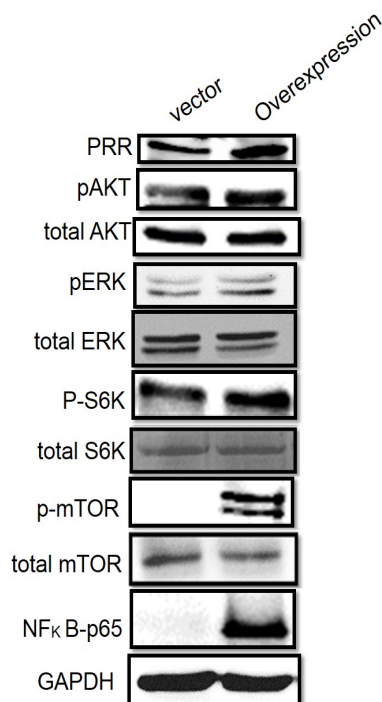

**Figure 4: Role of PRR in MAPK and PI3K/Akt pathways.** Western results have shown in A. overexpression of human PRR in Panc-1 cells.

Original article: Oncotarget. 2016; 7:55437-55448. <https://doi.org/10.18632/oncotarget.10583>
